# Supplementary material for: Quantitative glycoproteomics of high-density lipoproteins
Source: Royal Society of Chemistry journal article supplement (doi:10.1039/d2ra02294j), 2022-01-01
Supplement: d2ra02294j1.pdf [file d2ra02294j1.pdf]

## Supplementary Information

### Quantitative Glycoproteomics of High-Density Lipoproteins

Xinyu Tang,<sup>a</sup> Maurice Wong,<sup>b</sup> Jennyfer Tena,<sup>b</sup> Chenghao Zhu,<sup>a</sup> Christopher Rhodes,<sup>a</sup>  
Qingwen Zhou,<sup>b</sup> Anita Vinjamuri,<sup>b</sup> Armin Oloumi,<sup>b</sup> Sucharita Boddu,<sup>c</sup> Guillaume Luxardi,<sup>c</sup>  
Emanuel Maverakis,<sup>c</sup> Carlito B. Lebrilla<sup>b</sup>, and Angela M. Zivkovic<sup>\*a</sup>

<sup>a</sup>Department of Nutrition, University of California, Davis, One Shields Ave., Davis, CA 9516, US.

<sup>b</sup>Department of Chemistry, University of California, Davis, One Shields Ave., Davis, CA 95616, US.

<sup>c</sup>Department of Dermatology, University of California, Davis School of Medicine, 3301 C Street, Suite 1400, Sacramento, CA 95816, USA

E-mail: [amzivkovic@ucdavis.edu](mailto:amzivkovic@ucdavis.edu)

#### Table of Contents

|                                      |          |
|--------------------------------------|----------|
| <b>1. Supplemental Tables.....</b>   | <b>1</b> |
| <b>2. Supplemental Figures .....</b> | <b>6</b> |

#### 1. Supplemental Tables

**Table S1:** *The comparison between current HDL glycopeptide quantification method to previous methods*

|                                  | J.Huang et al. | Current method |
|----------------------------------|----------------|----------------|
| HDL proteins (n)                 | 8              | 33             |
| HDL peptides (n)                 | NA             | 47             |
| HDL glycopeptides (n)            | 23             | 170            |
| Absolute quantified proteins (n) | 0              | 5              |

**Table S2: List of proteins measured in the optimized MRM method.**

| Abbrev | Common Name                                | Uniprot code |
|--------|--------------------------------------------|--------------|
| APOA   | Apolipoprotein(A)                          | Q9UIR5       |
| APOA2  | Apolipoprotein A-II                        | P02652       |
| APOA4  | Apolipoprotein A-IV                        | P06727       |
| APOA5  | Apolipoprotein A-V                         | Q6Q788       |
| APOC2  | Apolipoprotein C-II                        | P02655       |
| APOC4  | Apolipoprotein C-IV                        | P55056       |
| APOF   | Apolipoprotein F                           | Q13790       |
| APOL1  | Apolipoprotein L1                          | O14791       |
| HPTR   | Haptoglobin-related protein                | P00739       |
| LCAT   | Phosphatidylcholine-sterol acyltransferase | P04180       |
| PLTP   | Phospholipid transfer protein              | P55058       |
| A1AT   | Alpha-1-antitrypsin                        | P01009       |
| A1BG   | Alpha-1B-glycoprotein                      | P04217       |
| AACT   | Alpha-1-antichymotrypsin                   | P01011       |
| APOA1  | Apolipoprotein A-I                         | P02647       |
| APOB   | Apolipoprotein B-100                       | P04114       |
| APOC1  | Apolipoprotein C-I                         | P02654       |
| APOC3  | Apolipoprotein C-III                       | P02656       |
| APOD   | Apolipoprotein D                           | P05090       |
| APOE   | Apolipoprotein E                           | P02649       |
| APOH   | Beta-2-glycoprotein 1                      | P02749       |
| APOM   | Apolipoprotein M                           | O95445       |
| C1S    | Complement C1s subcomponent                | P09871       |
| CLUS   | Clusterin                                  | P10909       |
| CO3    | Complement C3                              | P01024       |
| FETUA  | Alpha-2-HS-glycoprotein                    | P02765       |
| HEMO   | Hemopexin                                  | P02790       |
| HEP2   | Heparin cofactor 2                         | P05546       |
| KNG1   | Kininogen-1                                | P01042       |
| PON1   | Serum paraoxonase/arylesterase 1           | P27169       |
| SAA    | Serum amyloid A protein (SAA4 variant)     | B2R5G8       |
| SAA1   | Serum amyloid A-1 protein                  | PODJ18       |
| SAA2   | Serum amyloid A-2 protein                  | PODJ19       |

**Table S3: MRM Transitions and (glyco)peptide details.**

| Protein Group | Compound            | Precursor Ion | Product Ion (Quant) | Product Ion (Qual) | Ret Time (min) | Delta Ret Time | Collision Energy | Peptide Sequence                                  | Charge State | Glycan Position <sup>1</sup> | Glycan Composition (Hex_HexNAc_Fuc_NeuAc) |
|---------------|---------------------|---------------|---------------------|--------------------|----------------|----------------|------------------|---------------------------------------------------|--------------|------------------------------|-------------------------------------------|
| ISTD          | ISTD_RPAIANNPVPR    | 494.3         | 631.4               | 534.3              | 16.3           | 1.5            | 12               | RPAIANNPVPR                                       | 3            |                              |                                           |
| ISTD          | ISTD_RPAIANNPVPR_z2 | 740.9         | 1324.8              | 631.4              | 16.3           | 1.5            | 15               | RPAIANNPVPR                                       | 2            |                              |                                           |
| ISTD          | ISTD_RPAIANNPVPR_z4 | 371           | 534.3               | 631.4              | 16.3           | 1.5            | 10               | RPAIANNPVPR                                       | 4            |                              |                                           |
| A1AT          | A1AT_AVLTIDEK       | 444.8         | 718.4               | 605.3              | 12.2           | 1.5            | 11               | AVLTIDEK                                          | 2            |                              |                                           |
| A1AT          | A1AT_70_5402        | 1078.5        | 366.1               | 274.1              | 46.6           | 1.5            | 26               | QLAHQSN <sup>70</sup> STNIFFSPVSIATAFAMLSLGTK     | 5            | 70                           | 5402                                      |
| A1AT          | A1AT_70_5412        | 1107.7        | 366.1               |                    | 45.3           | 1.5            | 27               | QLAHQSN <sup>70</sup> STNIFFSPVSIATAFAMLSLGTK     | 5            | 70                           | 5412                                      |
| A1AT          | A1AT_107_5401       | 1122.4        | 366.1               |                    | 43.2           | 1.5            | 30               | ADTHDEILEGLNFN <sup>107</sup> LTEIPEAQIHGEGFQELLR | 5            | 107                          | 5401                                      |
| A1AT          | A1AT_107_5402       | 1180.6        | 366.1               |                    | 43.2           | 1.5            | 29               | ADTHDEILEGLNFN <sup>107</sup> LTEIPEAQIHGEGFQELLR | 5            | 107                          | 5402                                      |
| A1AT          | A1AT_107_5411       | 1151.6        | 366.1               |                    | 42.9           | 1.5            | 28               | ADTHDEILEGLNFN <sup>107</sup> LTEIPEAQIHGEGFQELLR | 5            | 107                          | 5411                                      |
| A1AT          | A1AT_107_5412       | 1209.8        | 366.1               |                    | 43.2           | 1.5            | 30               | ADTHDEILEGLNFN <sup>107</sup> LTEIPEAQIHGEGFQELLR | 5            | 107                          | 5412                                      |
| A1AT          | A1AT_107_6503       | 1311.8        | 366.1               |                    | 43.6           | 1.5            | 33               | ADTHDEILEGLNFN <sup>107</sup> LTEIPEAQIHGEGFQELLR | 5            | 107                          | 6503                                      |
| A1AT          | A1AT_107_6512       | 1282.9        | 366.1               |                    | 43.5           | 1.5            | 30               | ADTHDEILEGLNFN <sup>107</sup> LTEIPEAQIHGEGFQELLR | 5            | 107                          | 6512                                      |
| A1AT          | A1AT_107_6513       | 1341          | 366.1               |                    | 43.5           | 1.5            | 34               | ADTHDEILEGLNFN <sup>107</sup> LTEIPEAQIHGEGFQELLR | 5            | 107                          | 6513                                      |
| A1AT          | A1AT_107_6501/6520  | 1195.4        | 366.1               | 274.1              | 43.2           | 1.5            | 30               | ADTHDEILEGLNFN <sup>107</sup> LTEIPEAQIHGEGFQELLR | 5            | 107                          | 6501/6520                                 |
| A1AT          | A1AT_107_6502/6521  | 1253.6        | 366.1               |                    | 43.1           | 1.5            | 30               | ADTHDEILEGLNFN <sup>107</sup> LTEIPEAQIHGEGFQELLR | 5            | 107                          | 6502/6521                                 |
| A1AT          | A1AT_271_5401       | 1223.9        | 366.1               |                    | 29.6           | 1.5            | 30               | YLGN <sup>271</sup> ATAIFFLPDEGK                  | 3            | 271                          | 5401                                      |
| A1AT          | A1AT_271_5402       | 991.2         | 366.1               |                    | 29.6           | 1.5            | 24               | YLGN <sup>271</sup> ATAIFFLPDEGK                  | 4            | 271                          | 5402                                      |
| A1AT          | A1AT_271MC_5402     | 1149.9        | 366.1               |                    | 42.9           | 1.5            | 28               | YLGN <sup>271</sup> ATAIFFLPDEGKQLHLENELTHDIITK   | 5            | 271                          | 5402                                      |
| A1AT          | A1AT_271_5412       | 1027.7        | 366.1               |                    | 29.6           | 1.5            | 25               | YLGN <sup>271</sup> ATAIFFLPDEGK                  | 4            | 271                          | 5412                                      |
| A1AT          | A1AT_271MC_5412     | 1179.1        | 366.1               |                    | 42.9           | 1.5            | 29               | YLGN <sup>271</sup> ATAIFFLPDEGKQLHLENELTHDIITK   | 5            | 271                          | 5412                                      |
| A1AT          | A1AT_271_55110_z3   | 1339.9        | 366.1               | 274.1              | 29.5           | 1.5            | 22               | YLGN <sup>271</sup> ATAIFFLPDEGK                  | 3            | 271                          | 5511                                      |
| A1AT          | A1AT_271_6503       | 1155          | 274.1               | 366.1              | 29.8           | 1.5            | 30               | YLGN <sup>271</sup> ATAIFFLPDEGK                  | 4            | 271                          | 6503                                      |
| A1BG          | A1BG_LLELTGPK       | 435.8         | 644.4               | 757.4              | 15.5           | 1.5            | 11               | LLELTGPK                                          | 2            |                              |                                           |

<sup>1</sup> Denotes the position in the protein sequence that includes the signal peptide

| Protein Group | Compound                        | Precursor Ion | Product Ion (Quant) | Product Ion (Qual) | Ret Time (min) | Delta Ret Time | Collision Energy | Peptide Sequence                                 | Charge State | Glycan Position <sup>1</sup> | Glycan Composition (Hex, HexNAc, Fuc, NeuAc) |
|---------------|---------------------------------|---------------|---------------------|--------------------|----------------|----------------|------------------|--------------------------------------------------|--------------|------------------------------|----------------------------------------------|
| A18G          | A18G_179_5421/5402              | 1209.5        | 366.1               |                    | 24.4           | 1.5            | 36               | EGDHEFLVPEAQEDVEATFPVHQPGN <sup>177</sup> YSCYSR | 5            | 179                          | 5421/5402                                    |
| AACT          | AACT_ADLSGITGAR                 | 480.8         | 661.4               | 404.2              | 11.8           | 1.5            | 13               | ADLSGITGAR                                       | 2            |                              |                                              |
| AACT          | AACT_106_7603                   | 1407.3        | 366.1               |                    | 20.6           | 1.5            | 35               | FN <sup>106</sup> LETSEAEIHQSFQHLR               | 4            | 106                          | 7603                                         |
| AACT          | AACT_106_7604                   | 1480.1        | 366.1               |                    | 24.1           | 1.5            | 35               | FN <sup>106</sup> LETSEAEIHQSFQHLR               | 4            | 106                          | 7604                                         |
| AACT          | AACT_127_5401                   | 1020.4        | 366.1               |                    | 25.1           | 1.5            | 32               | TLN <sup>127</sup> QSSDELQLSMGNAMFVK             | 4            | 127                          | 5401                                         |
| AACT          | AACT_127_8500                   | 1120.2        | 366.1               |                    | 25.3           | 1.5            | 34               | TLN <sup>127</sup> QSSDELQLSMGNAMFVK             | 4            | 127                          | 8500                                         |
| AACT          | AACT_271_6502                   | 1441.6        | 366.1               |                    | 19.6           | 1.5            | 35               | YTG <sup>271</sup> N <sup>271</sup> ASALFILPDQDK | 3            | 271                          | 6502                                         |
| AACT          | AACT_271_6512                   | 1118.2        | 366.1               |                    | 19.5           | 1.5            | 35               | YTG <sup>271</sup> N <sup>271</sup> ASALFILPDQDK | 4            | 271                          | 6512                                         |
| AACT          | AACT_271_7602                   | 1172.7        | 366.1               |                    | 19.2           | 1.5            | 35               | YTG <sup>271</sup> N <sup>271</sup> ASALFILPDQDK | 4            | 271                          | 7602                                         |
| AACT          | AACT_271_7603                   | 1245.8        | 366.1               |                    | 19.7           | 1.5            | 35               | YTG <sup>271</sup> N <sup>271</sup> ASALFILPDQDK | 4            | 271                          | 7603                                         |
| APOA          | APOA_NPDAAVAPCYTR_z2            | 749.3         | 398.2               | 859.4              | 20.8           | 1.5            | 22               | NPDAAVAPCYTR                                     | 2            |                              |                                              |
| APOA1         | APOA1_DLATVYVDVVK               | 618.3         | 736.4               | 936.5              | 26.5           | 1.5            | 17               | DLATVYVDVVK                                      | 2            |                              |                                              |
| APOA1         | APOA1_LAEYHAK                   | 416.2         | 647.3               | 718.4              | 3.9            | 1.5            | 10               | LAEYHAK                                          | 2            |                              |                                              |
| APOA2         | APOA2_AGTELVNFLSYFVELGTQPATQ_z2 | 1193.1        | 416.2               | 815.4, 945.5       | 47             | 1.5            | 38               | AGTELVNFLSYFVELGTQPATQ                           | 2            |                              |                                              |
| APOA2         | APOA2_SKEQLTPLIK_z2             | 578.9         | 941.6               | 470.3, 571.4       | 13             | 1.5            | 16               | SKEQLTPLIK                                       | 2            |                              |                                              |
| APOA2         | APOA2_35_11010_z2               | 1503.7        | 274.1               |                    | 33.9           | 3              | 49               | EPCVESLV <sup>35</sup> QYFQVTDYDGK               | 2            | 35                           | 1101                                         |
| APOA2         | APOA2_35_11020_z3               | 1099.8        | 274.1               |                    | 33.2           | 1.5            | 35               | EPCVESLV <sup>35</sup> QYFQVTDYDGK               | 3            | 35                           | 1102                                         |
| APOA2         | APOA2_88_11010_z2               | 1457.2        | 274.1               |                    | 45.5           | 1.5            | 48               | AGTELVNFLSYFVELGTQPATQ                           | 2            | 88/95                        | 1101                                         |
| APOA2         | APOA2_95_11010_z2               | 1521.2        | 274.1               |                    | 45.3           | 1.5            | 50               | AGTELVNFLSYFVELGTQPATQ                           | 2            | 88/95                        | 1101                                         |
| APOA4         | APOA4_LAPLAEDVR_z2              | 492.3         | 274.2               | 589.3, 702.4       | 13.8           | 1.5            | 13               | LAPLAEDVR                                        | 2            |                              |                                              |
| APOA4         | APOA4_LGEVNTYAGDLQK_z2          | 704.4         | 300.2               | 631.3, 1009.5      | 14.4           | 1.5            | 21               | LGEVNTYAGDLQK                                    | 2            |                              |                                              |
| APOA5         | APOA5_AQLLGGVDEAWALLQGLQSR_z3   | 709.1         | 801.5               | 200.1, 560.3       | 43.3           | 1.5            | 21               | AQLLGGVDEAWALLQGLQSR                             | 3            |                              |                                              |
| APOB          | APOB_AHLDIAGSLEGLHR_z3          | 496.9         | 209.1               | 482.3, 611.3       | 17.6           | 1.5            | 13               | AHLDIAGSLEGLHR                                   | 3            |                              |                                              |
| APOB          | APOB_GFEPTLEALFGK               | 654.8         | 975.6               | 488.5              | 32.2           | 1.5            | 14               | GFEPTLEALFGK                                     | 2            |                              |                                              |
| APOB          | APOB_185_52000_z3               | 1149.2        | 366.1               |                    | 23.1           | 1.5            | 18               | QVLFDTVYGN <sup>185</sup> CSTHFTVK               | 3            | 185                          | 5200                                         |
| APOB          | APOB_983_5401                   | 1366.6        | 366.1               |                    | 24.2           | 1.5            | 35               | QVFPGLNYCTSGAYSN <sup>983</sup> ASSTDSASYPLTGDR  | 4            | 983                          | 5401                                         |
| APOB          | APOB_983_54020_z4               | 1439.6        | 366.1               | 274.1              | 24.6           | 1.5            | 24               | QVFPGLNYCTSGAYSN <sup>983</sup> ASSTDSASYPLTGDR  | 4            | 983                          | 5402                                         |
| APOB          | APOB_3224_54020_z3              | 982.7         | 274.1               | 366.1              | 3              | 1.5            | 15               | SYN <sup>3224</sup> ETK                          | 3            | 3224                         | 5402                                         |
| APOB          | APOB_3411_5401                  | 1174.2        | 366.1               |                    | 10.4           | 1.5            | 30               | FVEGSHN <sup>3411</sup> STVSLTTK                 | 3            | 3411                         | 5401                                         |
| APOC1         | APOC1_OSELSAK                   | 381.7         | 305.2               | 418.3              | 3.6            | 1.5            | 9                | OSELSAK                                          | 2            |                              |                                              |
| APOC2         | APOC2_STAAMSTYTGIFTDQVLSVK_z3   | 745.1         | 446.3               | 1002.6, 1149.7     | 42.2           | 1.5            | 22               | STAAMSTYTGIFTDQVLSVK                             | 3            |                              |                                              |
| APOC2         | APOC2_TYLPVAVDEK_z2             | 518.3         | 237.1               | 265.1, 658.3       | 13.4           | 1.5            | 14               | TYLPVAVDEK                                       | 2            |                              |                                              |
| APOC3         | APOC3_DALSSVQESQVAQQAR          | 858.9         | 502.3               | 887.5              | 13.6           | 1.5            | 26               | DALSSVQESQVAQQAR                                 | 2            |                              |                                              |
| APOC3         | APOC3_GWVTDGFSSLK               | 598.8         | 244.1               | 854.4              | 21.4           | 1.5            | 17               | GWVTDGFSSLK                                      | 2            |                              |                                              |
| APOC3         | APOC3_94_0300                   | 916.1         | 204.1               |                    | 28.4           | 1.5            | 22               | FSEFWLDLPEVRPT <sup>94</sup> SAVAA               | 3            | 94                           | 0300                                         |
| APOC3         | APOC3_94_0310                   | 975.4         | 204.1               |                    | 28.5           | 1.5            | 24               | FSEFWLDLPEVRPT <sup>94</sup> SAVAA               | 3            | 94                           | 0310                                         |
| APOC3         | APOC3_94A_11000_z2              | 1251.6        | 366.1               |                    | 29.4           | 1.5            | 40               | FSEFWLDLPEVRPT <sup>94</sup> SAVAA               | 2            | 94                           | 1100                                         |
| APOC3         | APOC3_94AMC_11000_z3            | 915.8         | 366.1               |                    | 28.4           | 1.5            | 28               | DKFSEFWLDLPEVRPT <sup>94</sup> SAVAA             | 3            | 94                           | 1100                                         |
| APOC3         | APOC3_94_1101                   | 931.8         | 274.1               |                    | 29.4           | 1.5            | 22               | FSEFWLDLPEVRPT <sup>94</sup> SAVAA               | 3            | 94                           | 1101                                         |
| APOC3         | APOC3_94A_11010_z2              | 1397.1        | 274.1               |                    | 29.4           | 1.5            | 45               | FSEFWLDLPEVRPT <sup>94</sup> SAVAA               | 2            | 94                           | 1101                                         |
| APOC3         | APOC3_94Aoff_1101               | 908.1         | 274.1               |                    | 29.4           | 1.5            | 22               | FSEFWLDLPEVRPT <sup>94</sup> SAVAA               | 3            | 94                           | 1101                                         |
| APOC3         | APOC3_94MC_1101                 | 989.1         | 274.1               |                    | 28.4           | 1.5            | 24               | DKFSEFWLDLPEVRPT <sup>94</sup> SAVAA             | 3            | 94                           | 1101                                         |
| APOC3         | APOC3_94_1102                   | 1028.8        | 274.1               |                    | 30             | 1.5            | 25               | FSEFWLDLPEVRPT <sup>94</sup> SAVAA               | 2            | 94                           | 1102                                         |
| APOC3         | APOC3_94A_11020_z2              | 1542.7        | 274.1               |                    | 30             | 1.5            | 51               | FSEFWLDLPEVRPT <sup>94</sup> SAVAA               | 2            | 94                           | 1102                                         |
| APOC3         | APOC3_94Aoff_1102               | 1005.1        | 274.1               |                    | 30             | 1.5            | 24               | FSEFWLDLPEVRPT <sup>94</sup> SAVAA               | 3            | 94                           | 1102                                         |
| APOC3         | APOC3_94MC_1102                 | 1109.8        | 274.1               |                    | 29.2           | 1.5            | 27               | DKFSEFWLDLPEVRPT <sup>94</sup> SAVAA             | 3            | 94                           | 1102                                         |
| APOC3         | APOC3_94MC_11020_z3             | 1086.2        | 274.1               |                    | 29             | 1.5            | 34               | DKFSEFWLDLPEVRPT <sup>94</sup> SAVAA             | 3            | 94                           | 1102                                         |
| APOC3         | APOC3_94_1111                   | 980.4         | 274.1               |                    | 30.1           | 1.5            | 24               | FSEFWLDLPEVRPT <sup>94</sup> SAVAA               | 3            | 94                           | 1111                                         |
| APOC3         | APOC3_94_1202                   | 1096.5        | 274.1               |                    | 29.9           | 1.5            | 27               | FSEFWLDLPEVRPT <sup>94</sup> SAVAA               | 3            | 94                           | 1202                                         |
| APOC3         | APOC3_94AMC_12020_z3            | 1177.5        | 274.1               |                    | 26.3           | 1.5            | 38               | DKFSEFWLDLPEVRPT <sup>94</sup> SAVAA             | 3            | 94                           | 1202                                         |
| APOC3         | APOC3_94_1210                   | 951.1         | 366.1               |                    | 26.9           | 1.5            | 23               | FSEFWLDLPEVRPT <sup>94</sup> SAVAA               | 3            | 94                           | 1210                                         |
| APOC3         | APOC3_94_1300                   | 970.1         | 366.1               |                    | 29.6           | 1.5            | 23               | FSEFWLDLPEVRPT <sup>94</sup> SAVAA               | 3            | 94                           | 1300                                         |
| APOC3         | APOC3_94_2110                   | 937.4         | 366.1               |                    | 29.3           | 1.5            | 22               | FSEFWLDLPEVRPT <sup>94</sup> SAVAA               | 3            | 94                           | 2110                                         |
| APOC3         | APOC3_94AMC_22100_z3            | 1086.2        | 366.1               |                    | 25.4           | 1.5            | 34               | DKFSEFWLDLPEVRPT <sup>94</sup> SAVAA             | 3            | 94                           | 2210                                         |
| APOC3         | APOC3_94A_ungly_z2              | 1069          | 1097.6              |                    | 28.5           | 2              | 17               | FSEFWLDLPEVRPT <sup>94</sup> SAVAA               | 2            | 94                           | Unglycosylated                               |
| APOC4         | APOC4_GFMQTYDDHLR_z3            | 515.9         | 177.1               | 425.3, 818.4       | 17.4           | 1.5            | 14               | GFMQTYDDHLR                                      | 3            |                              |                                              |
| APOD          | APOD_VLNQELR                    | 436.3         | 659.4               | 545.3              | 8.9            | 1.5            | 11               | VLNQELR                                          | 2            |                              |                                              |
| APOD          | APOD_65_54010_z3                | 1148.1        | 366.1               | 274.1              | 17.4           | 1.5            | 18               | CIQAN <sup>65</sup> YSLMENGK                     | 3            | 65                           | 5401                                         |
| APOD          | APOD_65_54020_z3                | 1239.1        | 366.1               | 274.1              | 17             | 1.5            | 20               | CIQAN <sup>65</sup> YSLMENGK                     | 3            | 65                           | 5402                                         |
| APOD          | APOD_65_54200_z3                | 1148.5        | 366.1               |                    | 17.7           | 1.5            | 18               | CIQAN <sup>65</sup> YSLMENGK                     | 3            | 65                           | 5420                                         |
| APOD          | APOD_65_65010_z3                | 1269.5        | 366.1               | 274.1              | 17.4           | 2              | 20               | CIQAN <sup>65</sup> YSLMENGK                     | 3            | 65                           | 6501                                         |
| APOD          | APOD_65_65020_z3                | 1366.5        | 366.1               | 274.1              | 17.4           | 2              | 22               | CIQAN <sup>65</sup> YSLMENGK                     | 3            | 65                           | 6502                                         |
| APOD          | APOD_65_65020_z3_deamidated     | 1360.9        | 366.1               | 274.1              | 17.2           | 1.5            | 22               | CIQAN <sup>65</sup> YSLMENGK                     | 3            | 65                           | 6502                                         |
| APOD          | APOD_65_65030_z3                | 1463.6        | 366.1               | 274.1              | 16.5           | 1.5            | 24               | CIQAN <sup>65</sup> YSLMENGK                     | 3            | 65                           | 6503                                         |
| APOD          | APOD_65_65030_z3_deamidated     | 1457.9        | 366.1               | 274.1              | 20             | 1.5            | 24               | CIQAN <sup>65</sup> YSLMENGK                     | 3            | 65                           | 6503                                         |
| APOD          | APOD_65_65210_z3                | 1366.9        | 366.1               | 274.1              | 16.3           | 1.5            | 22               | CIQAN <sup>65</sup> YSLMENGK                     | 3            | 65                           | 6521                                         |
| APOD          | APOD_65_76020_z3                | 1488.6        | 366.1               | 274.1              | 18             | 1.5            | 24               | CIQAN <sup>65</sup> YSLMENGK                     | 3            | 65                           | 7602                                         |
| APOD          | APOD_65_76210_z3                | 1488.9        | 366.1               | 274.1              | 18             | 1.5            | 24               | CIQAN <sup>65</sup> YSLMENGK                     | 3            | 65                           | 7621                                         |
| APOD          | APOD_98_54000_z3                | 1292.9        | 366.1               |                    | 17             | 1.5            | 21               | ADGTVNQIEGATPVN <sup>98</sup> LTEPAK             | 3            | 98                           | 5400                                         |
| APOD          | APOD_98_54010_z3                | 1389.9        | 366.1               | 274.1              | 17.6           | 1.5            | 23               | ADGTVNQIEGATPVN <sup>98</sup> LTEPAK             | 3            | 98                           | 5401                                         |
| APOD          | APOD_98_5402_z3                 | 1115.7        | 366.1               | 274.1              | 18             | 1.5            | 34               | ADGTVNQIEGATPVN <sup>98</sup> LTEPAK             | 4            | 98                           | 5402                                         |
| APOD          | APOD_98_54020_z3                | 1487          | 366.1               | 274.1              | 18             | 1.5            | 24               | ADGTVNQIEGATPVN <sup>98</sup> LTEPAK             | 3            | 98                           | 5402                                         |
| APOD          | APOD_98_5410_z3                 | 1341.6        | 366.1               |                    | 16.8           | 1.5            | 35               | ADGTVNQIEGATPVN <sup>98</sup> LTEPAK             | 3            | 98                           | 5410                                         |
| APOD          | APOD_98_54100_z3                | 1341.6        | 366.1               |                    | 16.8           | 1.5            | 22               | ADGTVNQIEGATPVN <sup>98</sup> LTEPAK             | 3            | 98                           | 5410                                         |
| APOD          | APOD_98_54110_z3                | 1438.6        | 366.1               | 274.1              | 17.5           | 1.5            | 23               | ADGTVNQIEGATPVN <sup>98</sup> LTEPAK             | 3            | 98                           | 5411                                         |
| APOD          | APOD_98_54120_z3                | 1535.7        | 366.1               | 274.1              | 17.8           | 1.5            | 25               | ADGTVNQIEGATPVN <sup>98</sup> LTEPAK             | 3            | 98                           | 5412                                         |
| APOD          | APOD_98_65010_z3                | 1511.6        | 366.1               | 274.1              | 17.7           | 1.5            | 25               | ADGTVNQIEGATPVN <sup>98</sup> LTEPAK             | 3            | 98                           | 6501                                         |
| APOD          | APOD_98_6510_z3                 | 1098          | 366.1               |                    | 21.7           | 1.5            | 34               | ADGTVNQIEGATPVN <sup>98</sup> LTEPAK             | 4            | 98                           | 6510                                         |
| APOD          | APOD_98_65110_z3                | 1560.3        | 366.1               | 274.1              | 17.1           | 1.5            | 26               | ADGTVNQIEGATPVN <sup>98</sup> LTEPAK             | 3            | 98                           | 6511                                         |
| APOD          | APOD_98_65130_z3                | 1754.1        | 366.1               | 274.1              | 17.6           | 1.5            | 29               | ADGTVNQIEGATPVN <sup>98</sup> LTEPAK             | 3            | 98                           | 6513                                         |
| APOD          | APOD_98_6520_z3                 | 1134.5        | 366.1               |                    | 20.7           | 1.5            | 35               | ADGTVNQIEGATPVN <sup>98</sup> LTEPAK             | 4            | 98                           | 6520                                         |
| APOD          | APOD_98_6530_z3                 | 1171          | 366.1               |                    | 22.3           | 1.5            | 35               | ADGTVNQIEGATPVN <sup>98</sup> LTEPAK             | 4            | 98                           | 6530                                         |
| APOD          | APOD_98_65320_z3                | 1754.4        | 366.1               | 274.1              | 17.2           | 2              | 29               | ADGTVNQIEGATPVN <sup>98</sup> LTEPAK             | 3            | 98                           | 6532                                         |
| APOD          | APOD_98_7600_z3                 | 1152.7        | 366.1               |                    | 22.1           | 1.5            | 35               | ADGTVNQIEGATPVN <sup>98</sup> LTEPAK             | 4            | 98                           | 7600                                         |
| APOD          | APOD_98_9800_z3                 | 1335.3        | 366.1               |                    | 21.8           | 1.5            | 39               | ADGTVNQIEGATPVN <sup>98</sup> LTEPAK             | 4            | 98                           | 9800                                         |
| APOE          | APOE_AATVGLSAGLQQLER_z2         | 749.4         | 642.4               | 898.5              | 14.9           | 1.5            | 22               | AATVGLSAGLQQLER                                  | 2            |                              |                                              |



| Protein Group | Compound                     | Precursor Ion | Product Ion (Quant) | Product Ion (Qual) | Ret Time (min) | Delta Ret Time | Collision Energy | Peptide Sequence                       | Charge State | Glycan Position <sup>1</sup> | Glycan Composition (Hex, HexNAc, Fuc, NeuAc) |
|---------------|------------------------------|---------------|---------------------|--------------------|----------------|----------------|------------------|----------------------------------------|--------------|------------------------------|----------------------------------------------|
| PON1          | PON1_253_5402/5421           | 847.4         | 366.1               |                    | 16.8           | 1.5            | 28               | HAN <sup>23</sup> WLTPLK               | 4            | 253                          | 5402/5421                                    |
| PON1          | PON1_324_5420                | 1057.7        | 366.1               |                    | 25.5           | 1.5            | 33               | VTQVYAEN <sup>24</sup> GTVLQGGTVASVYK  | 4            | 324                          | 5420                                         |
| PON1          | PON1_324_6501                | 1149.3        | 366.1               |                    | 25.4           | 1.5            | 35               | VTQVYAEN <sup>24</sup> GTVLQGGTVASVYK  | 4            | 324                          | 6501                                         |
| PON1          | PON1_324_6502                | 1221.5        | 366.1               |                    | 24.1           | 1.5            | 37               | VTQVYAEN <sup>24</sup> GTVLQGGTVASVYK  | 4            | 324                          | 6502                                         |
| PON1          | PON1_324_65030_z3            | 1725.7        | 366.1               | 274.1              | 24             | 3              | 29               | VTQVYAEN <sup>24</sup> GTVLQGGTVASVYK  | 3            | 324                          | 6503                                         |
| PON3          | PON3_IFLMDLNEQNPR_z2         | 745.4         | 261.2               | 514.3, 985.5       | 42.2           | 1.5            | 22               | IFLMDLNEQNPR                           | 2            |                              |                                              |
| PON3          | PON3_LLNYNPEDPPGSEVLR_z2     | 907           | 854.5               | 618.3, 1195.6      | 20.6           | 1.5            | 28               | LLNYNPEDPPGSEVLR                       | 2            |                              |                                              |
| PON3          | PON3_29_75310_z3             | 1142.4        | 366.1               | 274.1              | 19.5           | 3              | 18               | VN <sup>29</sup> ASR                   | 3            | 29                           | 7531                                         |
| PON3          | PON3_29_76210_z3             | 1161.5        | 366.1               | 274.1              | 19.5           | 3              | 19               | VN <sup>29</sup> ASR                   | 3            | 29                           | 7621                                         |
| PON3          | PON3_29_76030/76220_z3       | 1258.2        | 366.1               | 274.1              | 16.5           | 4              | 20               | VN <sup>29</sup> ASR                   | 3            | 29                           | 76030/76220                                  |
| SAA           | SAA_94_43010_z3              | 1391.6        | 366.1               | 274.1              | 43.2           | 3              | 23               | VYLQGLIDYYLFGN <sup>24</sup> SSTVLEDSK | 3            | 94                           | 4301                                         |
| SAA           | SAA_94_44010_z3              | 1459.3        | 366.1               | 274.1              | 43.2           | 3              | 24               | VYLQGLIDYYLFGN <sup>24</sup> SSTVLEDSK | 3            | 94                           | 4401                                         |
| SAA           | SAA_94_53010_z3              | 1445.6        | 366.1               | 274.1              | 43.2           | 3              | 24               | VYLQGLIDYYLFGN <sup>24</sup> SSTVLEDSK | 3            | 94                           | 5301                                         |
| SAA           | SAA_94_54010_z3              | 1513.3        | 366.1               | 274.1              | 43.2           | 3              | 25               | VYLQGLIDYYLFGN <sup>24</sup> SSTVLEDSK | 3            | 94                           | 5401                                         |
| SAA           | SAA_94_54020_z3              | 1610.4        | 366.1               | 274.1              | 43.2           | 3              | 27               | VYLQGLIDYYLFGN <sup>24</sup> SSTVLEDSK | 3            | 94                           | 5402                                         |
| SAA           | SAA_94_54210_z3              | 1610.4        | 366.1               | 274.1              | 43.2           | 3              | 27               | VYLQGLIDYYLFGN <sup>24</sup> SSTVLEDSK | 3            | 94                           | 5421                                         |
| SAA           | SAA_94_55100_z3              | 1532.3        | 366.1               |                    | 43.2           | 3              | 25               | VYLQGLIDYYLFGN <sup>24</sup> SSTVLEDSK | 3            | 94                           | 5510                                         |
| SAA1          | SAA1_FFGHGAEDSLADQAANEWGR_z3 | 726.7         | 732.3               | 418.2, 948.4       | 20.2           | 1.5            | 21               | FFGHGAEDSLADQAANEWGR                   | 3            |                              |                                              |
| SAA1          | SAA1_GPGGVWAAEAISDAR_z3      | 486.2         | 448.2               | 561.3              | 19.8           | 1.5            | 13               | GPGGVWAAEAISDAR                        | 3            |                              |                                              |
| SAA2          | SAA2_GPGGAWAAEIVSNAR_z3      | 485.9         | 447.2               | 560.3              | 19.8           | 1.5            | 13               | GPGGAWAAEIVSNAR                        | 3            |                              |                                              |
| SAA/SAA4      | SAA4_FRPDGLPK_z2             | 465.3         | 244.2               | 516.3, 658.4       | 10.3           | 1.5            | 12               | FRPDGLPK                               | 2            |                              |                                              |

**Table S4:** Baseline characteristics of subjects in each experimental arm.

| Characteristics                               | Placebo      | N-AG         | <i>Spirulina</i> | Galactose    | P value |
|-----------------------------------------------|--------------|--------------|------------------|--------------|---------|
| n                                             | 4            | 6            | 6                | 6            |         |
| Sex = Male/Female                             | 2/2          | 3/3          | 3/3              | 3/3          |         |
| Age (yrs) (median[IQR])                       | 26[24-29]    | 27[25-28]    | 34[26-39]        | 28[27-31]    | 0.37    |
| Ethnicity = Asian/Biracial/Caucasian/Hispanic | 2/0/2/0      | 3/1/2/0      | 3/0/2/1          | 3/0/3/0      |         |
| Height (median[IQR])                          | 65[62-68]    | 70[66-71]    | 66[64-69]        | 68[67-69]    | 0.5     |
| Weight (lbs) (median[IQR])                    | 137[125-152] | 143[125-154] | 148[137-160]     | 152[139-161] | 0.81    |
| BMI (kg/m <sup>2</sup> ) (median[IQR])        | 24[23-24]    | 20[20-22]    | 24[22-25]        | 24[23-24]    | 0.07    |
| Systolic Blood Pressure (median[IQR])         | 108[102-113] | 117[102-120] | 104[98-116]      | 115[109-117] | 0.68    |
| Diastolic Blood Pressure (median[IQR])        | 66[64-70]    | 73[71-77]    | 72[66-83]        | 70[68-76]    | 0.76    |

## 2. Supplemental Figures

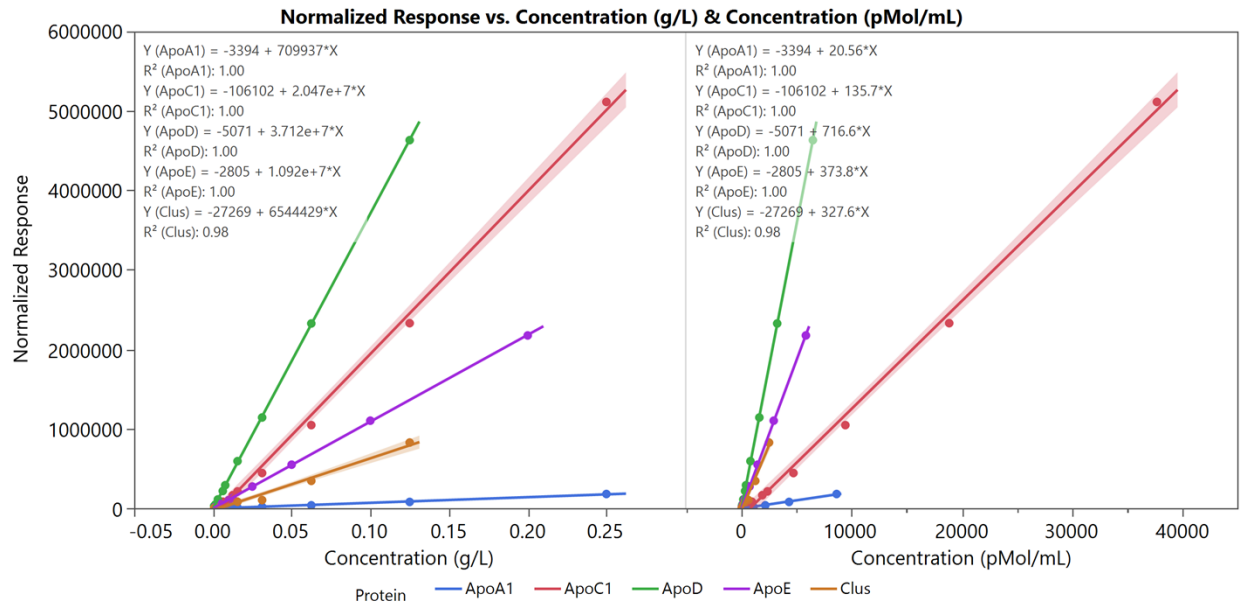

**Figure S1:** Linear calibration curve plots for ApoA1, ApoC1, ApoD, ApoE, and Clus based on (left) mass per volume concentration and (right) molar concentration.

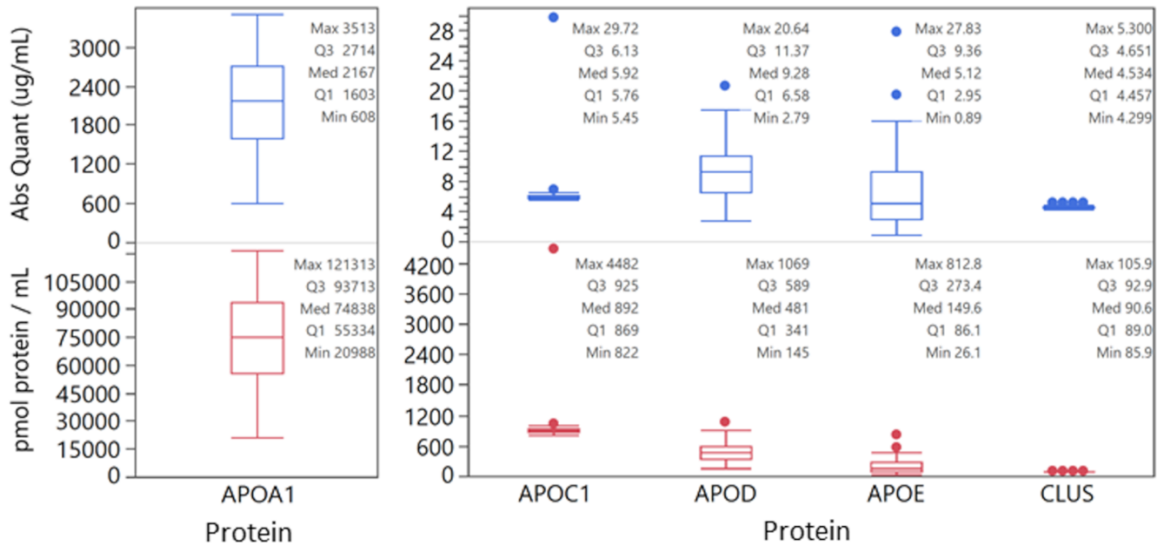

| Protein | w/v Concentration<br>( $\mu\text{g}$ protein / mL purified HDL) |      | Molar Concentration<br>(nM) |       | Coefficient of Variation (%) |
|---------|-----------------------------------------------------------------|------|-----------------------------|-------|------------------------------|
|         | Median                                                          | Mean | Median                      | Mean  |                              |
| APOA1   | 2167                                                            | 2154 | 74838                       | 74370 | 33.9                         |
| APOC1   | 5.92                                                            | 6.24 | 892                         | 941   | 42.9                         |
| APOD    | 9.28                                                            | 9.27 | 481                         | 480   | 38.1                         |
| APOE    | 5.12                                                            | 6.45 | 150                         | 189   | 76.3                         |
| CLUS    | 4.53                                                            | 4.57 | 90.6                        | 91.4  | 4.0                          |

**Figure S2:** Box plots of the absolute quantities of APOA1, APOC1, APOD, APOE, and Clus. The plots show the natural variability of the protein concentrations from 80 individuals.

### A) Peptides

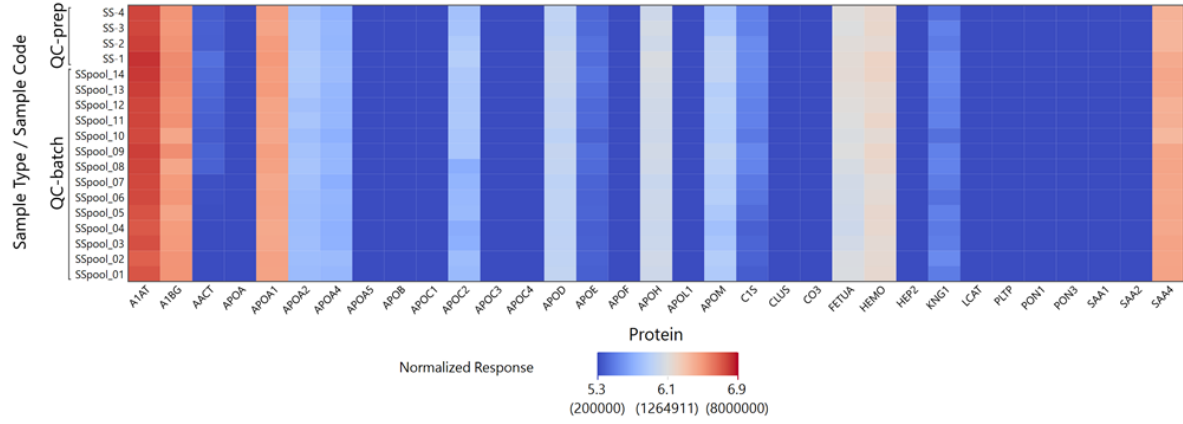

### B) Glycopeptides

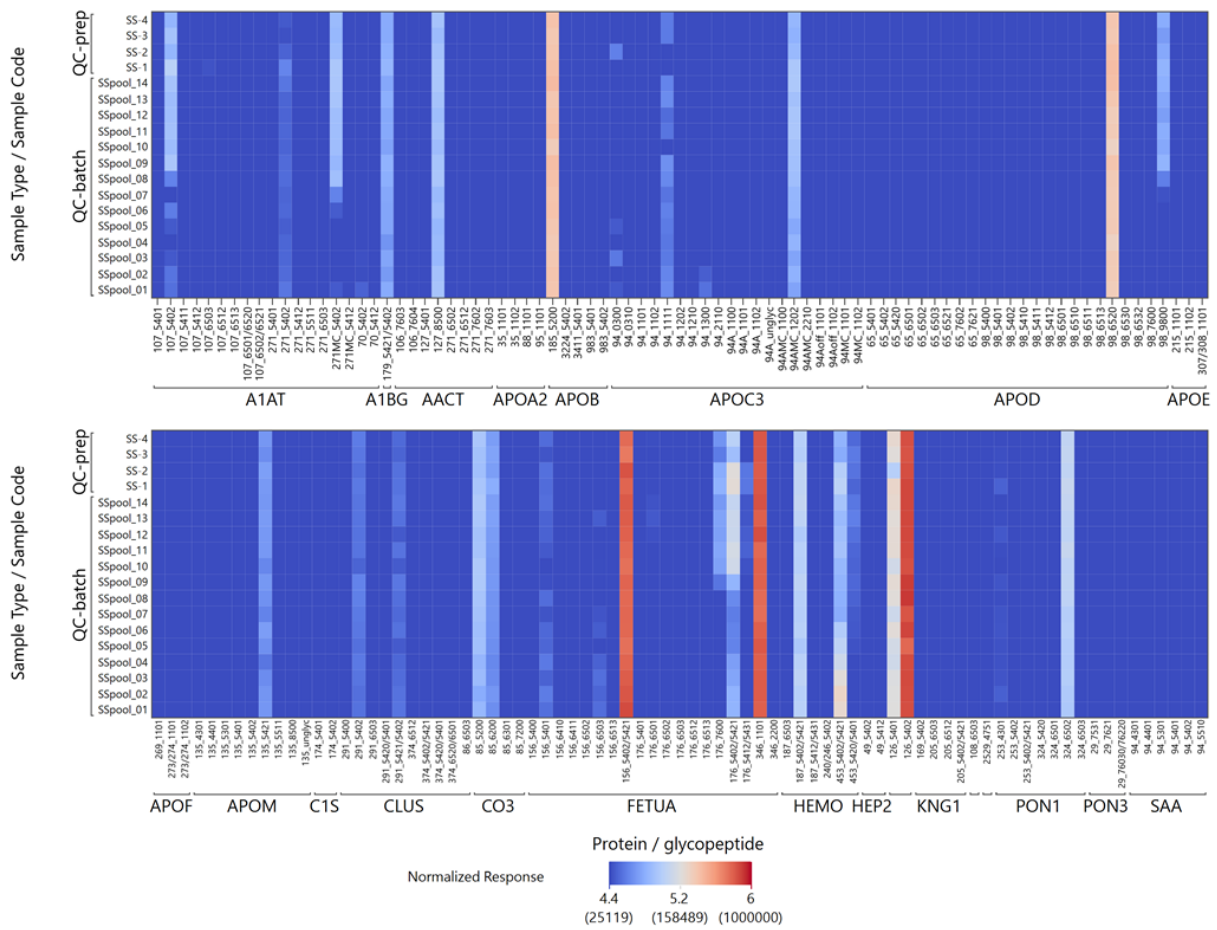

**Figure S3:** Heatmaps of the ISTD-normalized responses for (A) peptides and (B) glycopeptides in quality control samples.



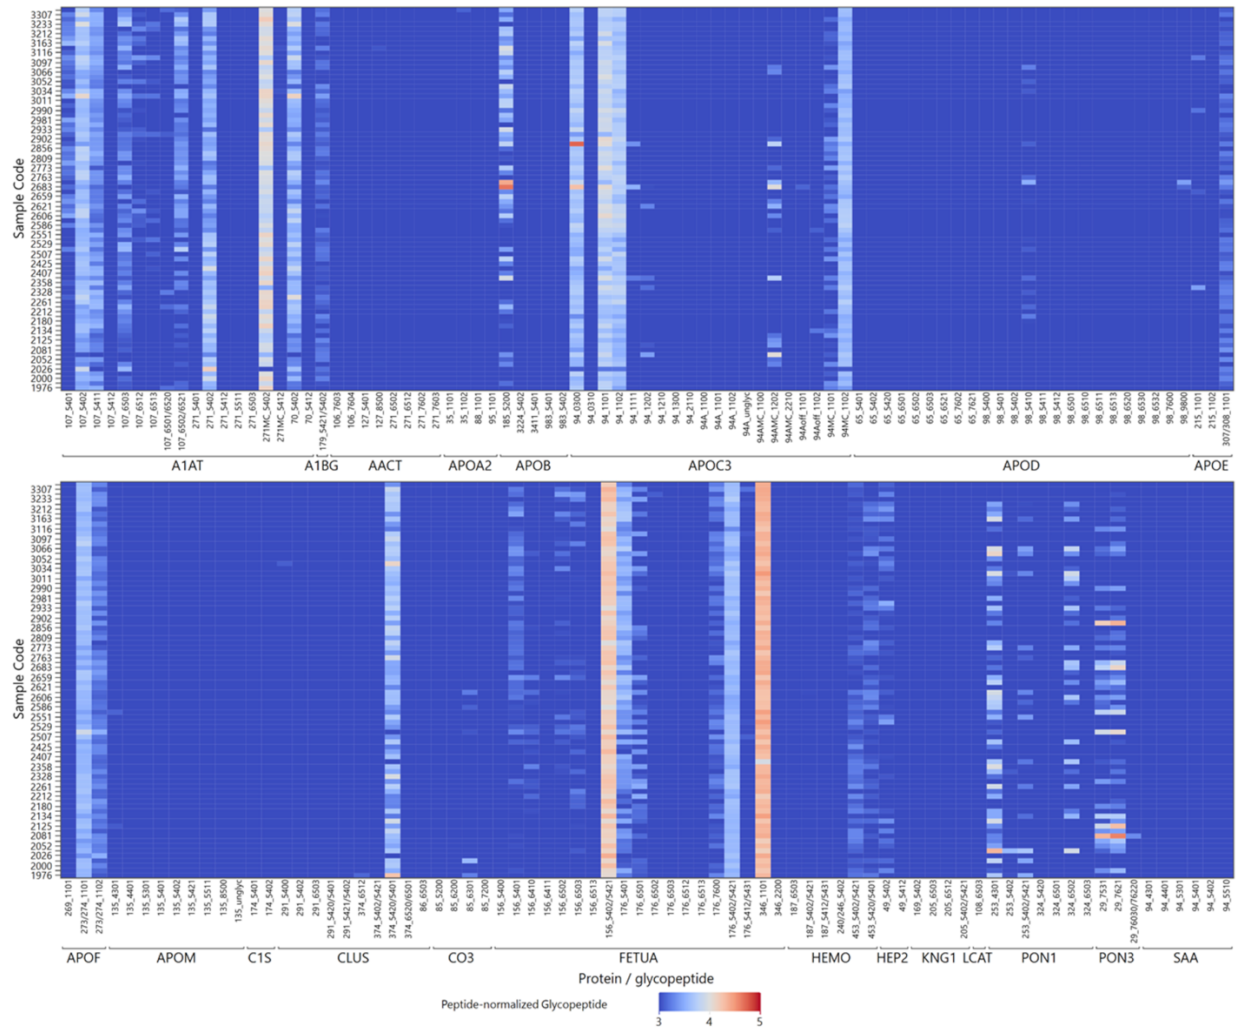

**Figure S4:** Heatmap of glycopeptide expression showing the peptide-normalized response for 168 glycoforms in each of the 80 samples. The color scaling is in the log<sub>10</sub> scale.
